# Supplementary material for: [18]Crown-6 rotator in spin-ladder compound of m-aminoanilinium([18]crown-6)[Ni(dmit)2]−
Source: Royal Society of Chemistry journal article supplement (doi:10.1039/c0dt00308e), 2010-01-01
Supplement: c0dt00308e.pdf [file c0dt00308e.pdf]

## Supporting Information

# [18]crown-6 Rotator in Spin-Ladder Compound of m-Aminoanilinium([18]crown-6)[Ni(dmit)<sub>2</sub>]

*Tomoyuki Akutagawa, Daisuke Sato, Qiong Ye, Shin-ichiro Noro, Sadamu Takeda, Takayoshi*

*Nakamura*

Full list of all authors in Ref. 19

Frisch, M. J.; Trucks, G. W.; Schlegel, H. B.; Scuseria, G. E.; Robb, M. A.; Cheeseman, J. R.; Zakrzewski, V. G.; Montgomery, J. A., Jr.; Stratmann, R. E.; Burant, J. C.; Dapprich, S.; Millam, J. M.; Daniels, A. D.; Kudin, K. N.; Strain, M. C.; Farkas, O.; Tomasi, J.; Barone, V.; Cossi, M.; Cammi, R.; Mennucci, B.; Pomelli, C.; Adamo, C.; Clifford, S.; Ochterski, J.; Petersson, G. A.; Ayala, P. Y.; Cui, Q.; Morokuma, K.; Malick, D. K.; Rabuck, A. D.; Raghavachari, K.; Foresman, J. B.; Cioslowski, J.; Ortiz, J. V.; Baboul, A. G.; Stefanov, B. B.; Liu, G.; Liashenko, A.; Piskorz, P.; Komaromi, I.; Gomperts, R.; Martin, R. L.; Fox, D. J.; Keith, T.; Al-Laham, M. A.; Peng, C. Y.; Nanayakkara, A.; Gonzalez, C.; Challacombe, M.; Gill, P. M. W.; Johnson, B.; Chen, W.; Wong, M. W.; Andres, J. L.; Gonzalez, C.; Head-Gordon, M.; Replogle, E. S.; Pople, J. A. *GAUSSIAN 98*; Gaussian, Inc.: Pittsburgh, PA, 1998.

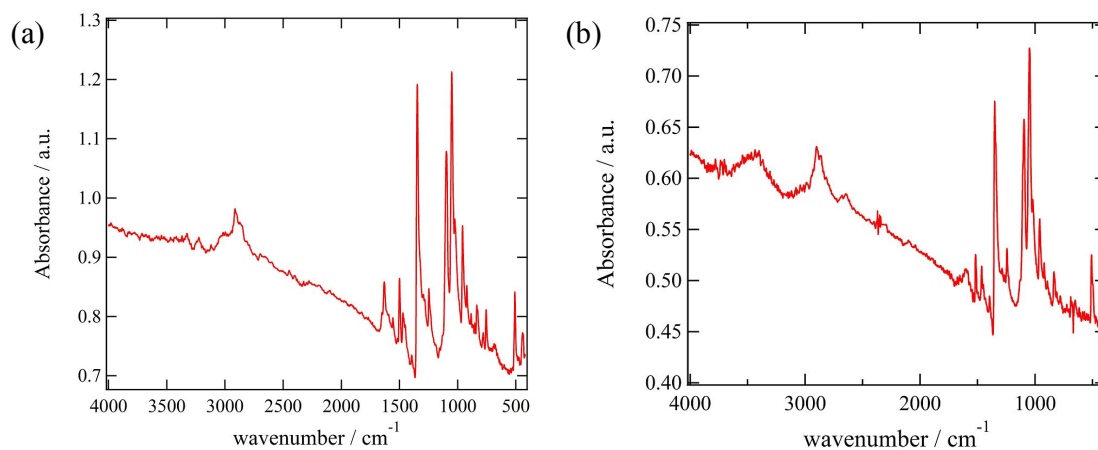

Fig. S1. IR spectra of salts a) 1 and b) 2 in KBr pellets.

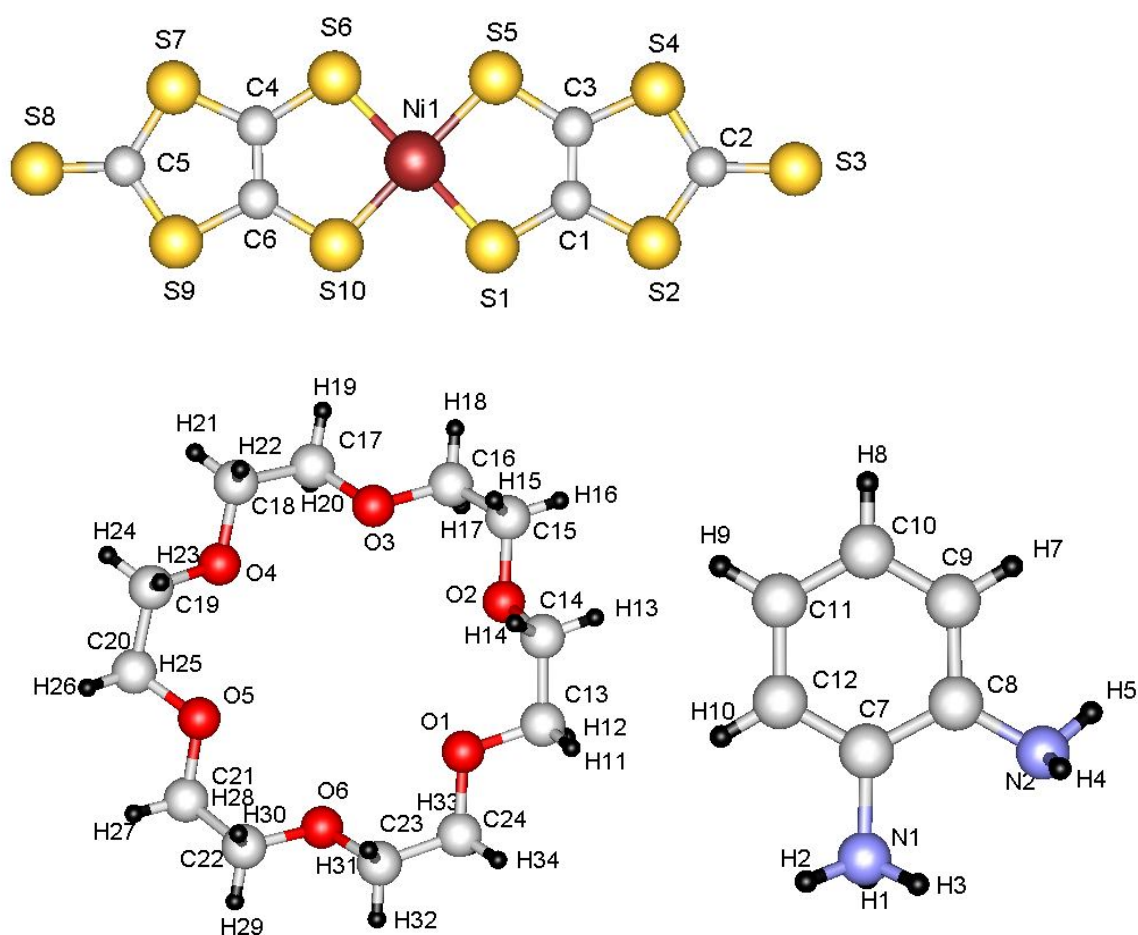

Fig. S2. Atomic numbering scheme of salt 1.

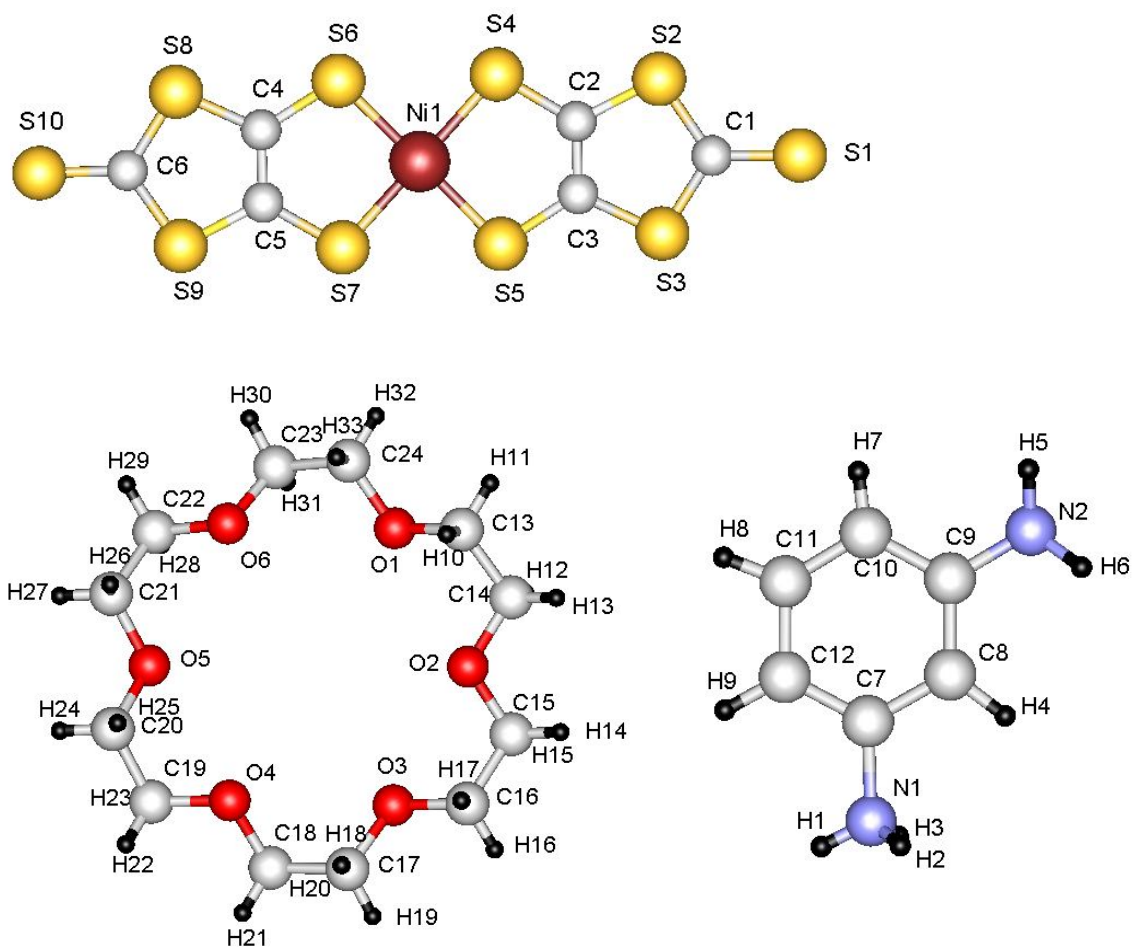

**Fig. S3.** Atomic numbering scheme of salt 2.

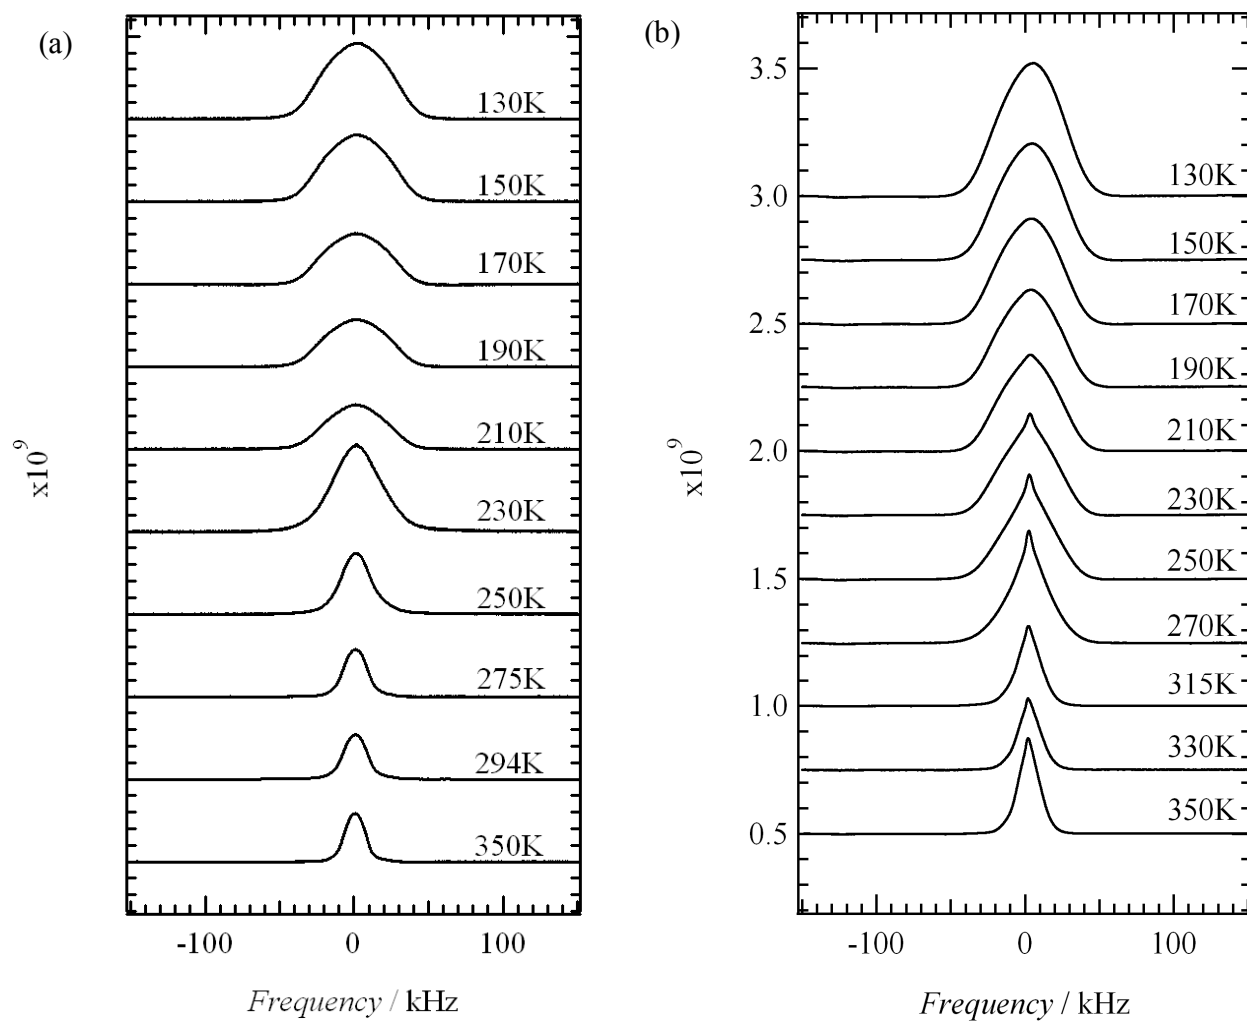

**Figure S4.** Temperature dependent solid state  $^1\text{H}$  NMR of salts a) **1** and b) **2**.

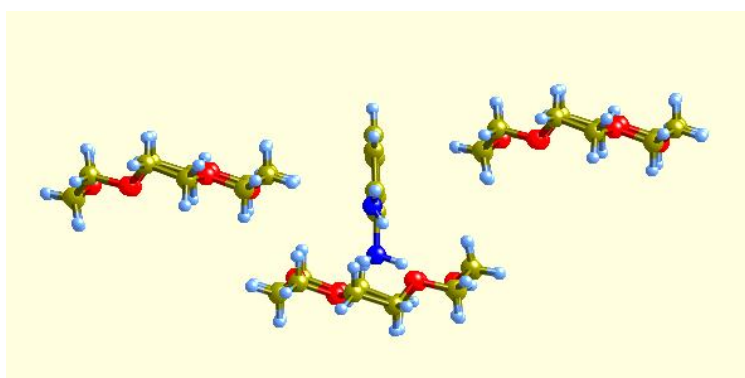

**Figure S5.** Potential energy calculation of HOPD<sup>+</sup> cation in (HOPD<sup>+</sup>)([18]crown-6)<sub>3</sub> unit of salt **1**.

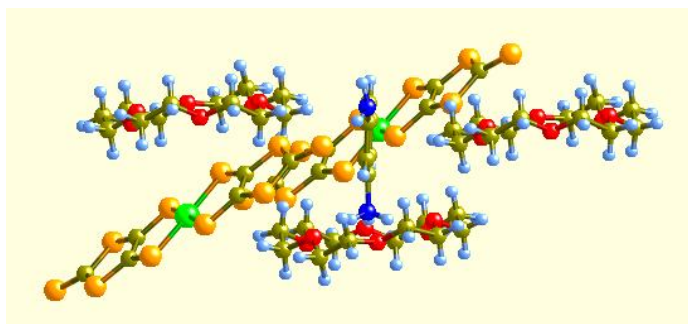

**Figure S6.** Potential energy calculation of  $\text{HMPD}^+$  cation in  $(\text{HMPD}^+)([\text{18}] \text{crown-6})_3[\text{Ni}(\text{dmit})_2]_2$  unit of salt **2**.

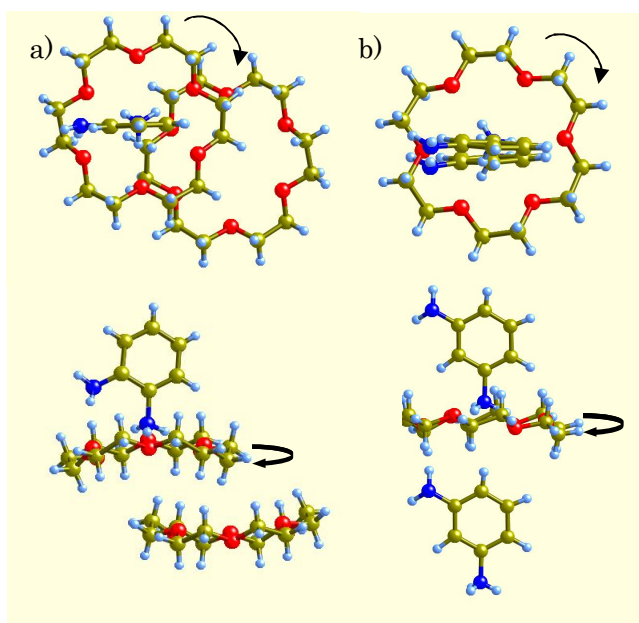

**Figure S7.** Rotation environment of  $[\text{18}] \text{crown-6}$  in salts **1** and **2**. a)  $(\text{HOPD}^+)([\text{18}] \text{crown-6})_2$  in salt **1** and b)  $(\text{HMPD}^+)_2([\text{18}] \text{crown-6})$  in salt **2**.

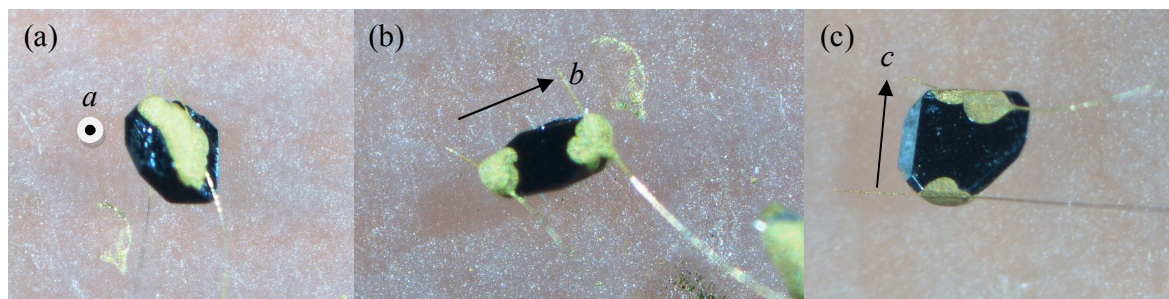

**Figure S8.** Single crystal for dielectric anisotropy measurements of salt **1**. Au wires were attached along the a) *a*-, b) *b*-, and c) *c*-axis.

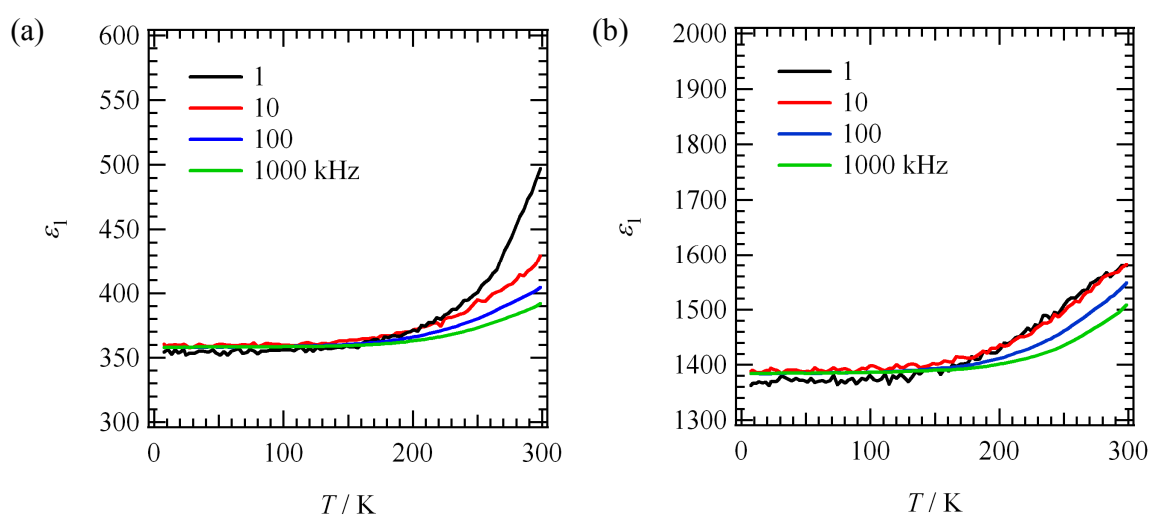

**Figure S9.** Temperature- and frequency-dependent dielectric constants ( $\epsilon_1$ ) of salt **1** along the a) *a*- and b) *b*-axes, respectively.

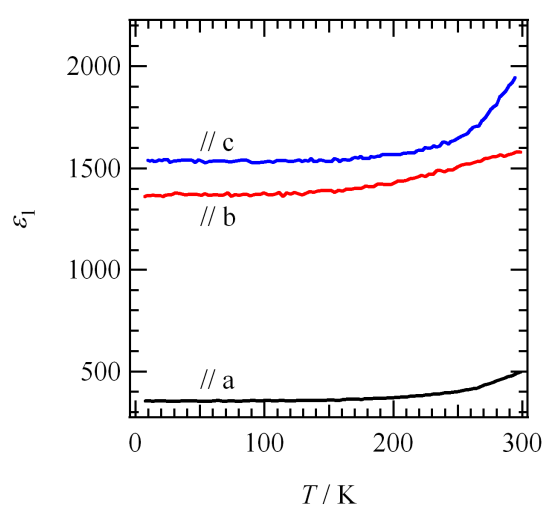

**Figure S10** Temperature-dependent dielectric anisotropy of salt **1** along the *a*- (black) and *b*- (red), and *c*-axes (blue), respectively, at the frequency of 10 kHz

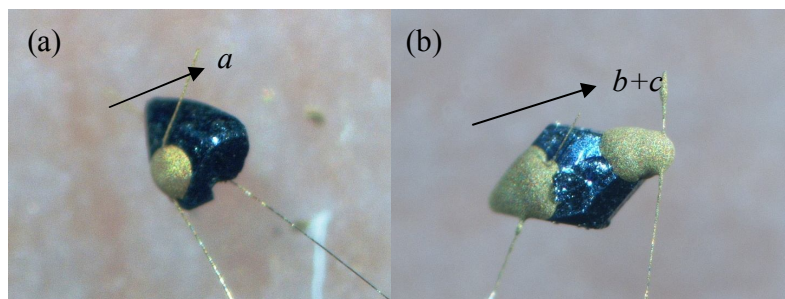

**Figure S11.** Single crystal for dielectric anisotropy measurements of salt **2**. Au wires were attached along the a) *a*- and b) *b+c*-axis.

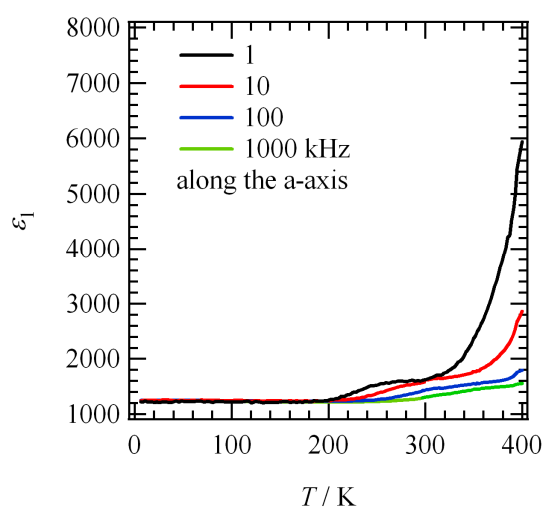

**Figure S12.** Temperature- and frequency-dependent dielectric constants ( $\epsilon_1$ ) of salt **2** along the *a*-axis.

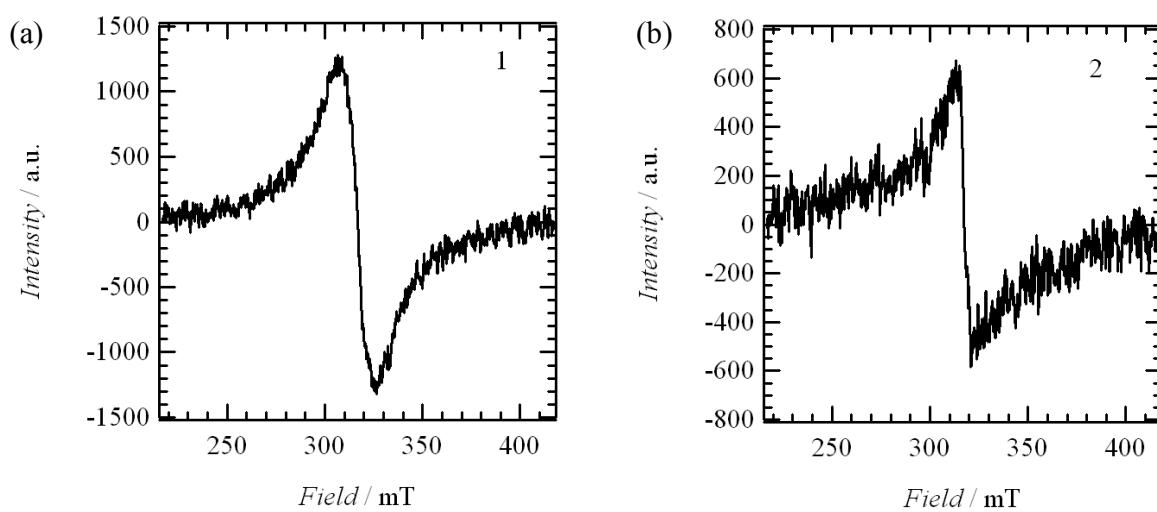

**Figure S13.** ESR spectra of salts a) **1** and b) **2** at 298 K.

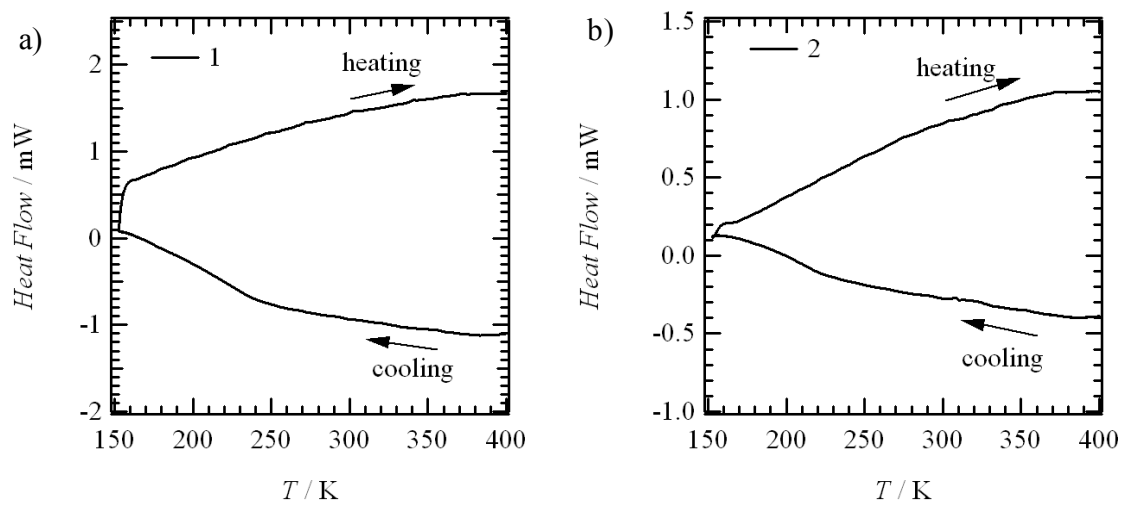

**Figure S14.** DSC diagram of salts a) **1** and b) **2**.
